# Supplementary material for: Epithelioid hemangioendotheliomas with TFE3 gene translocations are compossible with CAMTA1 gene rearrangements
Source: PubMed Central journal article supplement (PMC4884933; doi:10.18632/oncotarget.7060), 2016-01-28
Supplement: oncotarget-07-7480-s001.pdf [file oncotarget-07-7480-s001.pdf]

## Epithelioid hemangioendotheliomas with *TFE3* gene translocations are compossible with *CAMTA1* gene rearrangements

### Supplementary Material

#### Supplementary Data 1. Histologic findings of 18 EHEs

| Case | Histologic features     |                     |                              |                  |                    |                        |                   |                |
|------|-------------------------|---------------------|------------------------------|------------------|--------------------|------------------------|-------------------|----------------|
|      | Cellular feature        | Cytoplasmic feature | Nuclear atypia               | Amount of stroma | Hypercellular area | Blood vessel formation | Mitosis (/10HPFs) | Tumor necrosis |
| 1    | Spindle and epithelioid | Foamy               | Mild                         | Moderate         | Not identified     | Moderate               | 0                 | -              |
| 2    | Epithelioid             | Eosinophilic        | Mild                         | Moderate         | Not identified     | Moderate               | 0                 | -              |
| 3    | Epithelioid             | Eosinophilic        | Moderate                     | Abundant         | Not identified     | Moderate               | 0                 | -              |
| 4    | Epithelioid             | Eosinophilic        | Mild                         | Abundant         | Not identified     | Moderate               | 0                 | -              |
| 5    | Epithelioid             | Eosinophilic        | Mild                         | Abundant         | Not identified     | Moderate               | 0                 | -              |
| 6    | Spindle and epithelioid | Foamy               | Mild                         | Moderate         | Present            | Well                   | 2                 | -              |
| 7    | Spindle and epithelioid | Eosinophilic        | Moderate to focal high grade | Abundant         | Present            | Well                   | 0                 | -              |
| 8    | Epithelioid             | Eosinophilic        | Moderate                     | Moderate         | Present            | Well                   | 1                 | -              |
| 9    | Epithelioid             | Eosinophilic        | Moderate                     | Abundant         | Not identified     | Moderate               | 1                 | +              |
| 10   | Epithelioid             | Foamy               | Mild                         | Abundant         | Not identified     | Moderate               | 0                 | +              |
| 11   | Epithelioid             | Eosinophilic        | Moderate                     | Abundant         | Not identified     | Moderate               | 0                 | -              |
| 12   | Spindle and epithelioid | Eosinophilic        | Mild                         | Abundant         | Not identified     | Moderate               | 1                 | -              |
| 13   | Epithelioid             | Eosinophilic        | Moderate                     | Abundant         | Not identified     | Moderate               | 1                 | +              |

|    |                         |              |                              |          |                |          |   |   |
|----|-------------------------|--------------|------------------------------|----------|----------------|----------|---|---|
| 14 | Epithelioid             | Eosinophilic | Moderate                     | Abundant | Not identified | Moderate | 1 | + |
| 15 | Spindle and epithelioid | Foamy        | Mild                         | Abundant | Not identified | Moderate | 0 | - |
| 16 | Spindle and epithelioid | Foamy        | Moderate                     | Moderate | Present        | Moderate | 1 | - |
| 17 | Epithelioid             | Foamy        | Moderate to focal high grade | Moderate | Present        | Moderate | 1 | + |
| 18 | Epithelioid             | Eosinophilic | Moderate                     | Abundant | Not identified | Moderate | 0 | - |

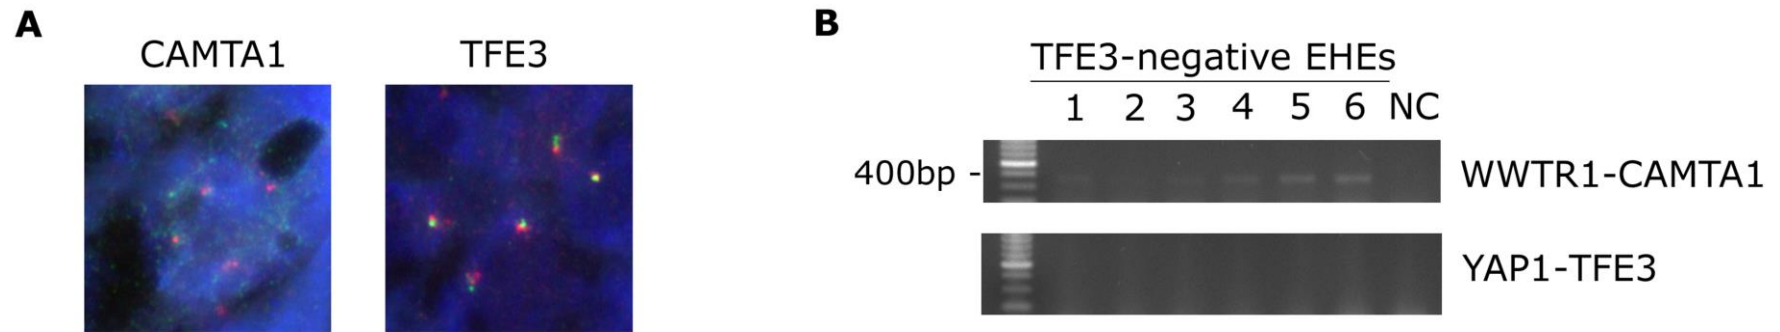

**Supplementary Data 2. CAMTA1 translocation in EHEs without TFE3 rearrangements.**

A. FISH assay results for TFE3 and CAMTA1 break-apart showing separated green and orange signals only within the CAMTA1 gene but not the TFE3 gene (1,000× magnification). B. RT-PCR assay results identifying the presence of fusion transcripts of WWTR1-CAMTA1 genes but not YAP1-TFE3 genes. N/C, negative control.

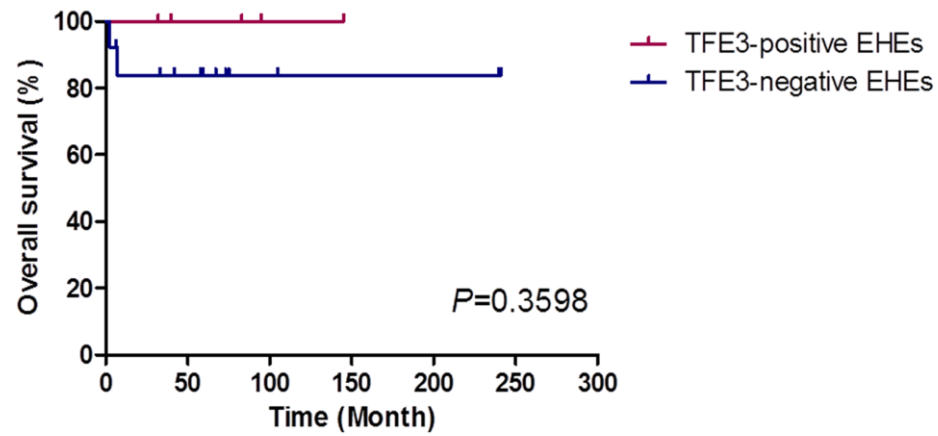

Supplementary Data 3. Comparison of the overall survival between patients with TFE3-positive and TFE3-negative EHEs by Kaplan-Meier analysis
